# Supplementary material for: Early Increase in Circulating PD-1+CD8+ T Cells Predicts Favorable Survival in Patients with Advanced Gastric Cancer Receiving Chemotherapy
Source: MDPI journal article supplement (doi:10.3390/cancers15153955), 2023-08-03
Supplement: s1 [file s1]

**Supplementary Table S4.** Baseline characteristics stratified by number of metastatic sites.

|                                    | <i>No of<br/>metastatic sites<br/>&lt; 2</i> |         | <i>No of metastatic<br/>sites ≥ 2</i> |          |              |
|------------------------------------|----------------------------------------------|---------|---------------------------------------|----------|--------------|
|                                    | n=45                                         |         | n=23                                  |          | p value*     |
| PD-1 <sup>+</sup> CD8 <sup>+</sup> |                                              |         |                                       |          | 0.071        |
| Increased                          | 22                                           | (48.9%) | 6                                     | (26.1%)  |              |
| Decreased                          | 23                                           | (51.1%) | 17                                    | (73.9%)  |              |
| Age (years)                        |                                              |         |                                       |          | 0.551        |
| < 65                               | 22                                           | (48.9%) | 13                                    | (56.5%)  |              |
| ≥ 65                               | 23                                           | (51.1%) | 10                                    | (43.5%)  |              |
| Sex                                |                                              |         |                                       |          | 0.596        |
| Male                               | 34                                           | (75.6%) | 16                                    | (69.6%)  |              |
| Female                             | 11                                           | (24.4%) | 7                                     | (30.4%)  |              |
| ECOG PS                            |                                              |         |                                       |          | 0.999        |
| 0,1                                | 42                                           | (93.3%) | 22                                    | (95.7%)  |              |
| 2                                  | 3                                            | (6.7%)  | 1                                     | (4.3%)   |              |
| Differentiation                    |                                              |         |                                       |          | 0.619        |
| Well to moderate                   | 13                                           | (28.9%) | 8                                     | (34.8%)  |              |
| Poor                               | 32                                           | (71.1%) | 15                                    | (65.2%)  |              |
| HER2                               |                                              |         |                                       |          | <b>0.015</b> |
| Positive                           | 1                                            | (2.2%)  | 5                                     | (21.7%)  |              |
| Negative                           | 44                                           | (97.8%) | 18                                    | (78.3%)  |              |
| Disease status                     |                                              |         |                                       |          | <b>0.044</b> |
| Locally advanced                   | 8                                            | (17.8%) | 0                                     | (0.0%)   |              |
| Recurrent or metastatic            | 37                                           | (82.2%) | 23                                    | (100.0%) |              |
| Peritoneal seeding                 |                                              |         |                                       |          | 0.147        |
| Yes                                | 21                                           | (46.7%) | 15                                    | (65.2%)  |              |
| No                                 | 24                                           | (53.3%) | 8                                     | (34.8%)  |              |
| NLR <sup>†</sup>                   |                                              |         |                                       |          | <b>0.021</b> |
| ≥ 3.2                              | 18                                           | (40.0%) | 16                                    | (69.6%)  |              |
| < 3.2                              | 27                                           | (60.0%) | 7                                     | (30.4%)  |              |
| PLR <sup>†</sup>                   |                                              |         |                                       |          | 0.798        |
| ≥ 163                              | 22                                           | (48.9%) | 12                                    | (52.2%)  |              |
| < 163                              | 23                                           | (51.1%) | 11                                    | (47.8%)  |              |
| CEA (ng/mL)                        |                                              |         |                                       |          | 0.549        |
| > 5                                | 17                                           | (37.8%) | 7                                     | (30.4%)  |              |
| ≤ 5                                | 28                                           | (62.2%) | 16                                    | (69.6%)  |              |
| CA 19-9 (U/mL)                     |                                              |         |                                       |          | 0.081        |
| > 37                               | 12                                           | (26.7%) | 11                                    | (47.8%)  |              |
| ≤ 37                               | 33                                           | (73.3%) | 12                                    | (52.2%)  |              |

---

Data are n (%). \*P value from Chi-square test or Fisher's exact test for categorical variables.  
HER2=human epidermal growth factor receptor 2. CEA=carcinoembryonic antigen, CA 19-9=Cancer antigen 19-9. PD-L1=programmed death ligand 1. CPS=combined positive score. NLR=Neutrophil to lymphocyte-ratio. PLR=Platelet to lymphocyte-ratio.
