# Supplementary material for: Early Increase in Circulating PD-1+CD8+ T Cells Predicts Favorable Survival in Patients with Advanced Gastric Cancer Receiving Chemotherapy
Source: MDPI journal article supplement (doi:10.3390/cancers15153955), 2023-08-03
Supplement: s1 [file s1]

**Supplementary Table S1.** The antibodies used in fluorescence-activated cell sorting (FACS).

| Antibody    | Supplier  | Cat. No. |
|-------------|-----------|----------|
| <u>FACS</u> |           |          |
| CD3         | BioLegend | 317314   |
| CD4         | BioLegend | 357416   |
| CD8         | BioLegend | 300910   |
| CD45        | BioLegend | 368510   |
| CD69        | BioLegend | 310912   |
| Ki-67       | BioLegend | 151212   |
| PD-1        | BioLegend | 329908   |
