# Supplementary material for: Early Increase in Circulating PD-1+CD8+ T Cells Predicts Favorable Survival in Patients with Advanced Gastric Cancer Receiving Chemotherapy
Source: MDPI journal article supplement (doi:10.3390/cancers15153955), 2023-08-03
Supplement: s1 [file s1]

a

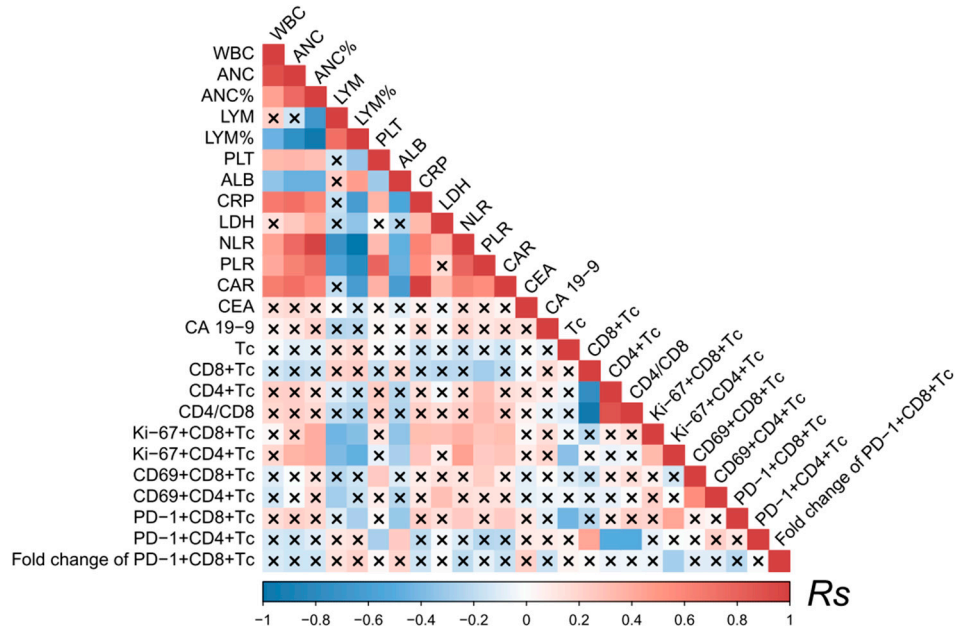

b

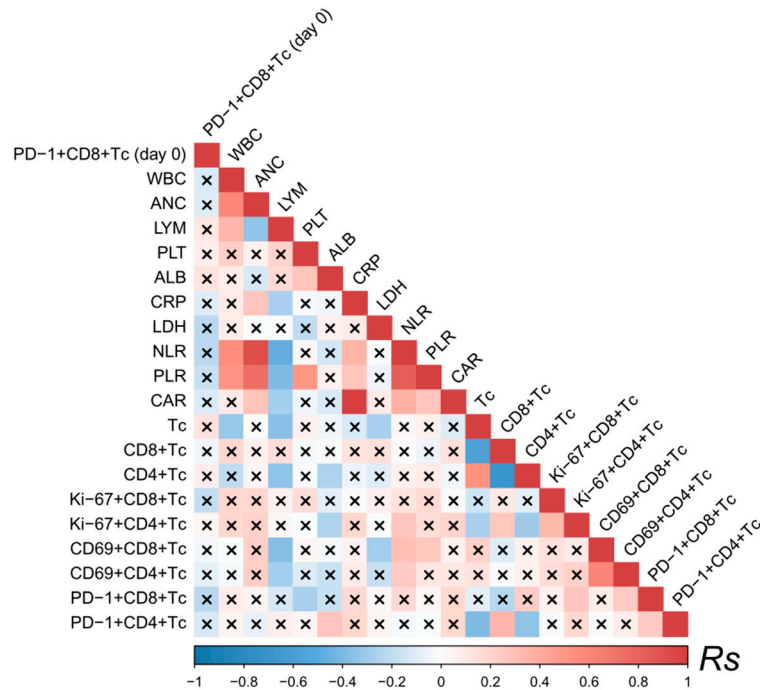

**Supplementary Figure S2.** Correlation matrix of laboratory factors. (a) Correlation matrix between subsets of Tt cells and inflammatory markers from baseline. (b) Correlation matrix between the fold changes of subsets of T cells and inflammatory markers from day 0 to day 7. Spearman's correlation analysis was performed. A value of  $p < 0.05$  denoted statistical significance. 'x' indicates absence of statistical significance.  $R_s$ , Spearman's rank correlation coefficient; WBC, White blood cells; ANC, Absolute neutrophil count; LYM, Lymphocytes; PLT, platelet count; ALB, albumin; CRP, C-reactive protein; NLR, Neutrophil-lymphocyte ratio; PLR, Platelet-lymphocyte ratio; CAR, CRP to albumin ratio; Tc, T cells.
