# Supplementary material for: Early Increase in Circulating PD-1+CD8+ T Cells Predicts Favorable Survival in Patients with Advanced Gastric Cancer Receiving Chemotherapy
Source: MDPI journal article supplement (doi:10.3390/cancers15153955), 2023-08-03
Supplement: s1 [file s1]

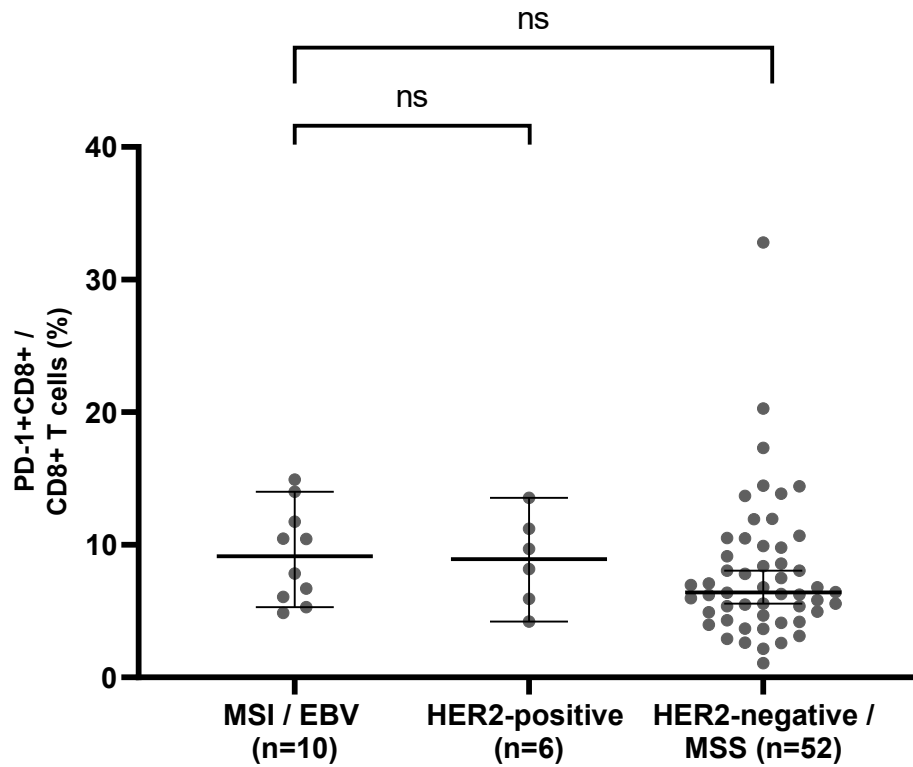

**Supplementary Figure S1.** Baseline PD-1+CD8+ T-cell frequencies among CD8+ T-cells according to MSI/EBV and HER2 status. No statistical difference was found between the groups. The Mann-Whitney U-test was used for analysis. HER2, human epidermal growth factor receptor 2; EBV, Epstein-Barr virus; MSI, Microsatellite instability; MSS, Microsatellite stable.
