# Supplementary material for: Early Increase in Circulating PD-1+CD8+ T Cells Predicts Favorable Survival in Patients with Advanced Gastric Cancer Receiving Chemotherapy
Source: MDPI journal article supplement (doi:10.3390/cancers15153955), 2023-08-03
Supplement: s1 [file s1]

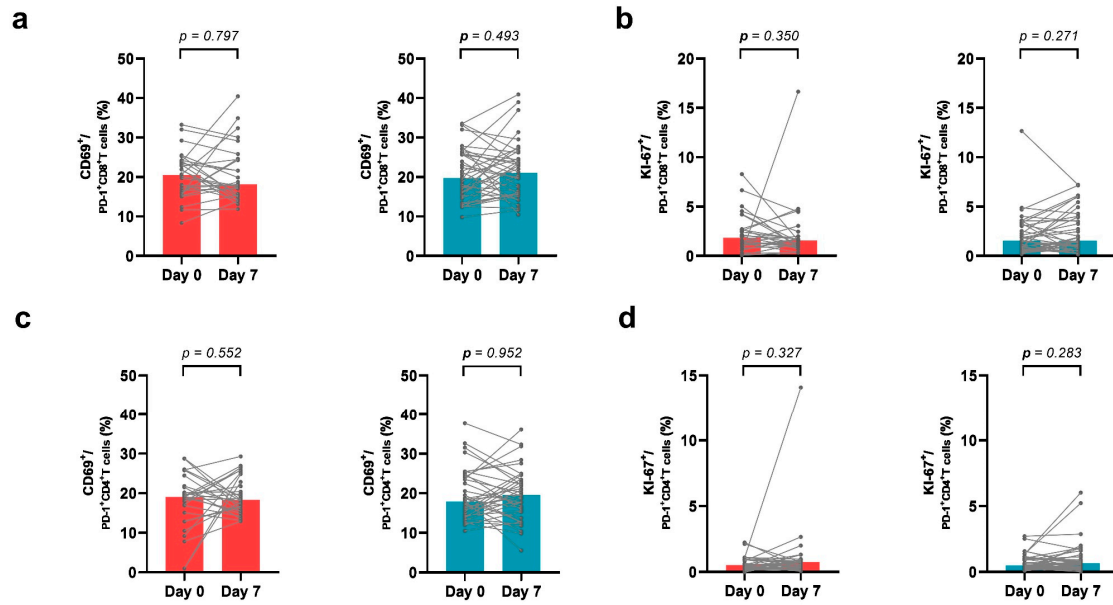

**Supplementary Figure S3.** Dynamic change of CD69 and Ki-67 expression of circulatory PD1<sup>+</sup>CD8<sup>+</sup> (a,b) and PD1<sup>+</sup>CD4<sup>+</sup> (c,d) T cells from days 0 to 7 in both the increased- and decreased-PD-1<sup>+</sup>CD8<sup>+</sup> T-cell groups (red bar and blue bar). A Wilcoxon matched-pairs signed rank test was performed for statistical analysis
