# Supplementary material for: Early Increase in Circulating PD-1+CD8+ T Cells Predicts Favorable Survival in Patients with Advanced Gastric Cancer Receiving Chemotherapy
Source: MDPI journal article supplement (doi:10.3390/cancers15153955), 2023-08-03
Supplement: s1 [file s1]

**Supplementary Table S3.** Univariate and multivariate analysis for duration of response

|                                      | <i>univariate</i> |              |                | <i>multivariate</i> |             |                |
|--------------------------------------|-------------------|--------------|----------------|---------------------|-------------|----------------|
|                                      | HR                | (95%CI)      | <i>p</i> value | HR                  | (95%CI)     | <i>p</i> value |
| <b>Duration of response (n = 29)</b> |                   |              |                |                     |             |                |
| Age ( $\geq 65$ )                    | 2.03              | 0.89 - 4.63  | 0.091          | 1.07                | 0.37 - 3.12 | 0.897          |
| Sex (male)                           | 1.78              | 0.60 - 5.29  | 0.297          |                     |             |                |
| ECOG PS (2)                          | 1.26              | 0.60 - 2.61  | 0.542          |                     |             |                |
| Differentiation (poorly)             | 0.76              | 0.50 - 1.15  | 0.198          |                     |             |                |
| HER2 (positive)                      | 4.41              | 1.46 - 13.28 | <b>0.009</b>   | 1.57                | 0.35 - 7.07 | 0.559          |
| Disease status (metastatic)          | 0.9               | 0.31 - 2.62  | 0.842          |                     |             |                |
| No. of metastatic sites ( $\geq 2$ ) | 3.43              | 1.28 - 9.18  | <b>0.014</b>   | 1.42                | 0.33 - 6.19 | 0.639          |
| CEA ( $>5$ ng/mL)                    | 0.79              | 0.35 - 1.76  | 0.557          |                     |             |                |
| CA 19-9 ( $>37$ U/mL)                | 2.05              | 0.92 - 4.57  | 0.079          | 1.59                | 0.50 - 5.00 | 0.432          |
| NLR ( $\geq$ median)                 | 2.69              | 1.19 - 6.11  | <b>0.018</b>   | 1.95                | 0.67 - 5.70 | 0.222          |
| PLR ( $\geq$ median)                 | 0.88              | 0.52 - 2.47  | 0.754          |                     |             |                |
| Increase in PD1+CD8+T cells          | 0.38              | 0.15 - 0.92  | <b>0.033</b>   | 0.55                | 0.18 - 1.63 | 0.280          |
