# Supplementary material for: Early Increase in Circulating PD-1+CD8+ T Cells Predicts Favorable Survival in Patients with Advanced Gastric Cancer Receiving Chemotherapy
Source: MDPI journal article supplement (doi:10.3390/cancers15153955), 2023-08-03
Supplement: s1 [file s1]

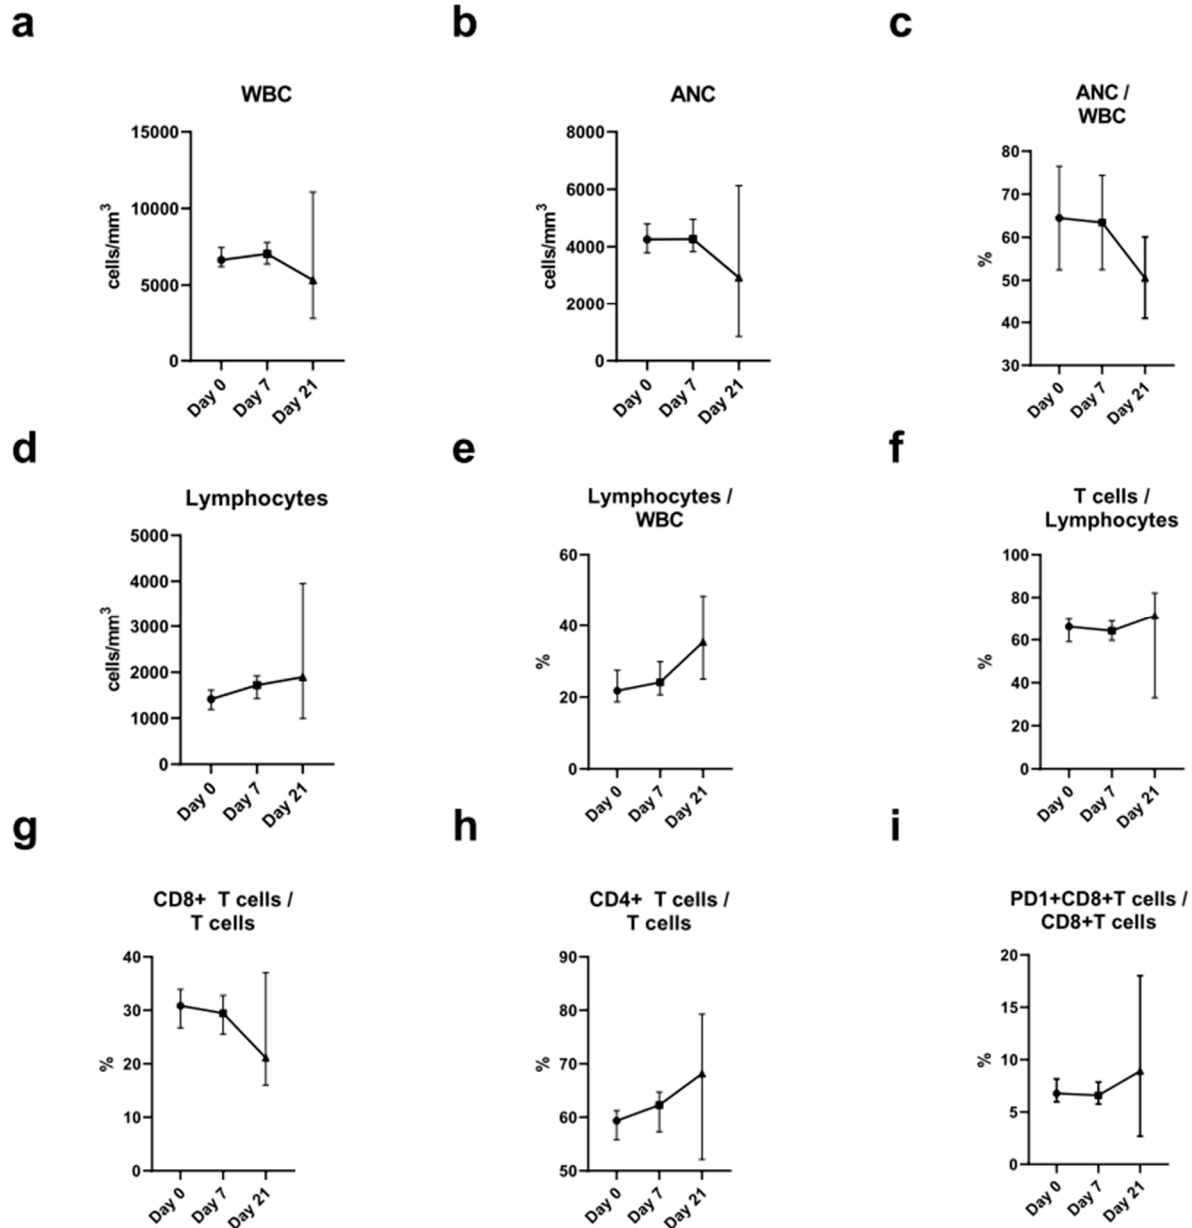

**Supplementary Figure S5.** Dynamic change in the count and proportion of blood cells from day 0 to day 21. Wilcoxon matched-pairs signed rank test was performed to compare values between day 0 and day 7. The values from Day 21 were not compared with Day 0 and Day 7 due to the low sample size ( $n = 8$ ). (a–i) No significant difference was found between day 0 to day 7 in White blood cell (WBC), Absolute neutrophil count (ANC), lymphocytes, the frequencies of T cells among lymphocytes, of CD8<sup>+</sup> T cells among T cells, of CD4<sup>+</sup> T cells among T cells, and of PD1<sup>+</sup>CD8<sup>+</sup> T cells among CD8<sup>+</sup> T cells.
