# Supplementary material for: Early Increase in Circulating PD-1+CD8+ T Cells Predicts Favorable Survival in Patients with Advanced Gastric Cancer Receiving Chemotherapy
Source: MDPI journal article supplement (doi:10.3390/cancers15153955), 2023-08-03
Supplement: s1 [file s1]

**Supplementary Table S2.** HER2, EBV and MSI status according to increased or decreased frequencies of PD1+CD8+ T cells.

|       |             | <i>Increased</i>                                      |         | <i>Decreased</i>                                      |         |          |
|-------|-------------|-------------------------------------------------------|---------|-------------------------------------------------------|---------|----------|
|       |             | <i>PD1<sup>+</sup>CD8<sup>+</sup>T-cell<br/>group</i> |         | <i>PD1<sup>+</sup>CD8<sup>+</sup>T-cell<br/>group</i> |         |          |
|       |             | n=28                                                  |         | n=40                                                  |         | p value* |
| <hr/> |             |                                                       |         |                                                       |         |          |
| HER2  |             |                                                       |         |                                                       |         | 0.999    |
|       | Positive    | 2                                                     | (7.1%)  | 4                                                     | (10.0%) |          |
|       | Negative    | 26                                                    | (92.9%) | 36                                                    | (90.0%) |          |
| EBV   |             |                                                       |         |                                                       |         | 0.999    |
|       | Positive    | 2                                                     | (7.1%)  | 4                                                     | (10.0%) |          |
|       | Negative    | 26                                                    | (92.9%) | 36                                                    | (90.0%) |          |
| MSI   |             |                                                       |         |                                                       |         | 0.638    |
|       | Instability | 1                                                     | (3.6%)  | 3                                                     | (7.5%)  |          |
|       | Stability   | 27                                                    | (96.4%) | 37                                                    | (92.5%) |          |

\* P value from chi-squared tests or Fisher's exact tests for categorical variables. Data are represented as n (%).  
HER2, human epidermal growth factor receptor 2; EBV, Epstein-Barr virus; MSI, Microsatellite instability.
