# Supplementary material for: Early Increase in Circulating PD-1+CD8+ T Cells Predicts Favorable Survival in Patients with Advanced Gastric Cancer Receiving Chemotherapy
Source: MDPI journal article supplement (doi:10.3390/cancers15153955), 2023-08-03
Supplement: s1 [file s1]

**Supplementary Table S5.** Baseline characteristics according to baseline frequency of PD1+CD8+ T cells

|                                | <i>PD1+CD8+</i><br><i>high ( ≥ 6.8%)</i><br>n=34 |         | <i>PD1+CD8+</i><br><i>low ( &lt; 6.8%)</i><br>n=34 |         | p value*     |
|--------------------------------|--------------------------------------------------|---------|----------------------------------------------------|---------|--------------|
| <b>Age (years)</b>             |                                                  |         |                                                    |         | 0.467        |
| < 65                           | 16                                               | (47.1%) | 19                                                 | (55.9%) |              |
| ≥ 65                           | 18                                               | (52.9%) | 15                                                 | (44.1%) |              |
| <b>Sex</b>                     |                                                  |         |                                                    |         | <b>0.012</b> |
| Male                           | 30                                               | (88.2%) | 20                                                 | (58.8%) |              |
| Female                         | 4                                                | (11.8%) | 14                                                 | (41.2%) |              |
| <b>ECOG PS</b>                 |                                                  |         |                                                    |         | 1.000        |
| 0,1                            | 32                                               | (94.1%) | 32                                                 | (94.1%) |              |
| 2                              | 2                                                | (5.9%)  | 2                                                  | (5.9%)  |              |
| <b>Differentiation</b>         |                                                  |         |                                                    |         | 0.793        |
| Well to moderate               | 10                                               | (29.4%) | 11                                                 | (32.4%) |              |
| Poor                           | 24                                               | (70.6%) | 23                                                 | (67.6%) |              |
| <b>HER2</b>                    |                                                  |         |                                                    |         | 0.673        |
| Positive                       | 4                                                | (11.8%) | 2                                                  | (5.9%)  |              |
| Negative                       | 30                                               | (88.2%) | 32                                                 | (94.1%) |              |
| <b>Disease status</b>          |                                                  |         |                                                    |         | 0.709        |
| Locally advanced               | 5                                                | (14.7%) | 3                                                  | (8.8%)  |              |
| Metastatic                     | 29                                               | (85.3%) | 31                                                 | (91.2%) |              |
| <b>Peritoneal seeding</b>      |                                                  |         |                                                    |         | 0.145        |
| Yes                            | 15                                               | (44.1%) | 21                                                 | (61.8%) |              |
| No                             | 19                                               | (55.9%) | 13                                                 | (38.2%) |              |
| <b>No. of metastatic sites</b> |                                                  |         |                                                    |         | 0.442        |
| ≥ 2                            | 10                                               | (29.4%) | 13                                                 | (38.2%) |              |
| < 2                            | 24                                               | (70.6%) | 21                                                 | (61.8%) |              |
| <b>CEA (ng/mL)</b>             |                                                  |         |                                                    |         | 1.000        |
| > 5                            | 12                                               | (35.3%) | 12                                                 | (35.3%) |              |
| ≤ 5                            | 22                                               | (64.7%) | 22                                                 | (64.7%) |              |
| <b>CA 19-9 (U/mL)</b>          |                                                  |         |                                                    |         | 0.798        |
| > 37                           | 12                                               | (35.3%) | 11                                                 | (32.4%) |              |
| ≤ 37                           | 22                                               | (64.7%) | 23                                                 | (67.6%) |              |
| <b>Tissue PD-L1</b>            |                                                  |         |                                                    |         | 0.891        |
| CPS ≥ 10                       | 15                                               | (44.1%) | 15                                                 | (44.1%) |              |
| CPS < 10                       | 16                                               | (47.1%) | 17                                                 | (50.0%) |              |
| Undetermined                   | 3                                                | (8.8%)  | 2                                                  | (5.9%)  |              |

\* P value from chi-squared tests or Fisher's exact tests for categorical variables. Data are represented as n (%). ECOG PS, Eastern Cooperative Oncology Group Performance Status; HER2, human epidermal growth factor receptor 2; CEA, carcinoembryonic antigen; CA 19-9, Cancer antigen 19-9; PD-L1, programmed death ligand 1; CPS, combined positive score.
